# Supplementary material
Source: publisher figshare collection journal article supplement (https://tandf.figshare.com/ndownloader/files/36011608)
Supplement: Supplementary file 1 [file 36011608]

## Sheet: table 1 总reads clearn reads
Table S2：The information of reads in this study
Sample name	Raw reads	Clean reads	clean bases	Error rate(%)	Q20(%)	Q30(%)	GC content(%)
ADBJ_A	92055756	83783334	12.57G	0.02	96.44	91.12	55.64
ADBJ_B	106040002	101105706	15.17G	0.02	97.35	93.17	54.84
ADBJ_F	105106234	101766698	15.27G	0.02	97.07	92.57	57.19
NoADBJ_1	85436284	80827370	12.12G	0.02	96.45	91.12	54.11
NoADBJ_2	97353670	90589596	13.59G	0.02	96.46	91.22	48.67
NoADBJ_3	105333184	100131622	15.02G	0.02	96.78	91.94	50.44
